# Supplementary material for: Efficacy of Emu Oil Transfersomes for Local Transdermal Delivery of 4-OH Tamoxifen in the Treatment of Breast Cancer
Source: PubMed Central journal article supplement (PMC7558379; doi:10.3390/pharmaceutics12090807), 2020-08-25
Supplement: pharmaceutics-12-00807-s001.pdf [file pharmaceutics-12-00807-s001.pdf]

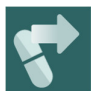

# Supplementary Materials: Efficacy of Emu Oil Transfersomes for Local Transdermal Delivery of 4-OH Tamoxifen in the Treatment of Breast Cancer.

Usha Sundralingam, Srikumar Chakravarth, Ammu K. Radhakrishnan, Saravanan Muniyandy and Uma D. Palanisamy

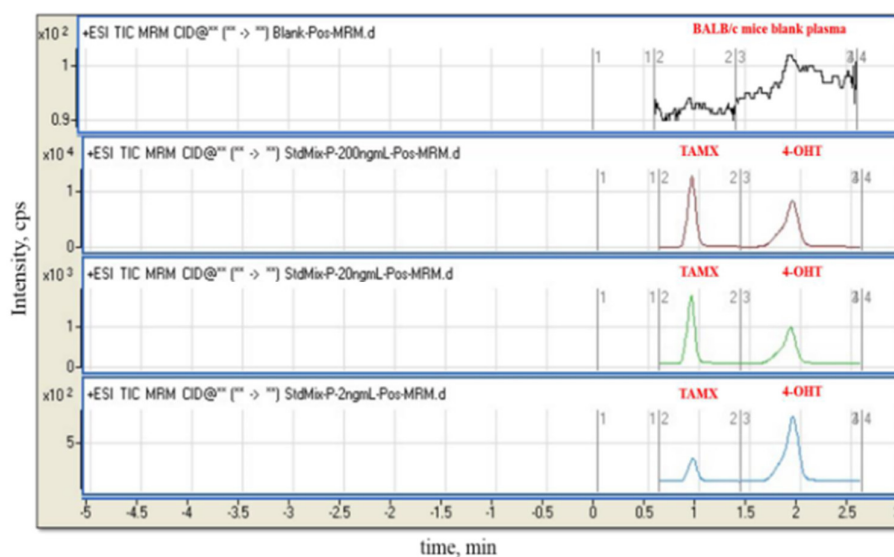

**Figure S1.** Typical MRM chromatograms of TAMX and 4-OHT in BALB/c mice plasma at three different concentrations (200, 20 and 2 ng/ml) of TAMX and 4-OHT spiked in the mice plasma compared against blank plasma.
